# Supplementary material for: Malformations in Late Devonian brachiopods from the western Junggar, NW China and their potential causes
Source: PeerJ. 2022 May 16;10:e13447. doi: 10.7717/peerj.13447 (PMC9119298; doi:10.7717/peerj.13447)
Supplement: Supplemental Information 1 [file peerj-10-13447-s001.xlsx]

## Sheet: Sheet1
Supplemental file 1. Shell lenght of Cleiothyridina and Crinisarina from the Upper Devonian Hongguleleng Formation in the Buninuer section, western Junggar
Undeformed specimens	No. (BGEG-)	Shell lenght (mm)	Undeformed specimens	No. (BGEG-)	Shell lenght (mm)	Malformed specimens	No. (BGEG-)	Shell lenght (mm)	Distribution of malformation (dorsal view)	Malformed specimens	No. (BGEG-)	Shell lenght (mm)	Distribution of malformation (dorsal view)
Cleiothyridina	CL01	23.3	Crinisarina	CR01	21.5	Cleiothyridina	CLJ01	14.4	both sides	Crinisarina	CRJ01	19.3	right side
Cleiothyridina	CL02	17.7	Crinisarina	CR02	25.3	Cleiothyridina	CLJ02	19.8	left side	Crinisarina	CRJ02	23.7	right side
Cleiothyridina	CL03	21	Crinisarina	CR03	24.7	Cleiothyridina	CLJ03	22.7	right side	Crinisarina	CRJ03	25.5	left side
Cleiothyridina	CL04	16.8	Crinisarina	CR04	21.5	Cleiothyridina	CLJ04	21.3	right side	Crinisarina	CRJ04	16.6	left side
Cleiothyridina	CL05	10	Crinisarina	CR05	22.3	Cleiothyridina	CLJ05	14.2	right side	Crinisarina	CRJ05	23.7	right side
Cleiothyridina	CL06	11.3	Crinisarina	CR06	24.6	Cleiothyridina	CLJ06	14.8	right side	Crinisarina	CRJ06	22.4	right side
Cleiothyridina	CL07	17.3	Crinisarina	CR07	17.7	Cleiothyridina	CLJ07	21.8	right side	Crinisarina	CRJ07	23.9	left side
Cleiothyridina	CL08	23.1	Crinisarina	CR08	22.4	Cleiothyridina	CLJ08	21.1	right side	Crinisarina	CRJ08	18.8	right side
Cleiothyridina	CL09	22.9	Crinisarina	CR09	20.5	Cleiothyridina	CLJ09	16.2	right side	Crinisarina	CRJ09	23.2	right side
Cleiothyridina	CL10	20.9	Crinisarina	CR10	23	Cleiothyridina	CLJ10	17.3	left side	Crinisarina	CRJ10	24.1	right side
Cleiothyridina	CL11	22	Crinisarina	CR11	22.5	Cleiothyridina	CLJ11	17.1	right side	Crinisarina	CRJ11	20.3	left side
Cleiothyridina	CL12	20.6	Crinisarina	CR12	25.6	Cleiothyridina	CLJ12	16.6	right side	Crinisarina	CRJ12	20.5	right side
Cleiothyridina	CL13	19.8	Crinisarina	CR13	25.5	Cleiothyridina	CLJ13	19.6	right side	Crinisarina	CRJ13	22.2	right side
Cleiothyridina	CL14	20	Crinisarina	CR14	22	Cleiothyridina	CLJ14	11.3	right side	Crinisarina	CRJ14	19.6	left side
Cleiothyridina	CL15	16.7	Crinisarina	CR15	21.6	Cleiothyridina	CLJ15	15.9	left side	Crinisarina	CRJ15	19.8	left side
Cleiothyridina	CL16	21.9	Crinisarina	CR16	21.5	Cleiothyridina	CLJ16	14.7	right side	Crinisarina	CRJ16	29.6	right side
Cleiothyridina	CL17	21	Crinisarina	CR17	23.3	Cleiothyridina	CLJ17	16.1	right side	Crinisarina	CRJ17	25.4	right side
Cleiothyridina	CL18	20.6	Crinisarina	CR18	15.9	Cleiothyridina	CLJ18	14.3	right side	Crinisarina	CRJ18	28.2	left side
Cleiothyridina	CL19	17.3	Crinisarina	CR19	21.9					Crinisarina	CRJ19	21	right side
Cleiothyridina	CL20	9.5	Crinisarina	CR20	24.2					Crinisarina	CRJ20	23.7	right side
Cleiothyridina	CL21	10	Crinisarina	CR21	24.1					Crinisarina	CRJ21	22.7	right side
Cleiothyridina	CL22	8	Crinisarina	CR22	28.9					Crinisarina	CRJ22	18.9	right side
Cleiothyridina	CL23	7.8	Crinisarina	CR23	15.3					Crinisarina	CRJ23	21.9	right side
Cleiothyridina	CL24	10.5	Crinisarina	CR24	14					Crinisarina	CRJ24	24.7	left side
Cleiothyridina	CL25	11.2	Crinisarina	CR25	16.9					Crinisarina	CRJ25	24.2	left side
Cleiothyridina	CL26	10.9	Crinisarina	CR26	14.1					Crinisarina	CRJ26	20.4	right side
Cleiothyridina	CL27	10.7	Crinisarina	CR27	20.8					Crinisarina	CRJ27	21.3	left side
Cleiothyridina	CL28	8.6	Crinisarina	CR28	17.9					Crinisarina	CRJ28	20.7	right side
Cleiothyridina	CL29	10.2	Crinisarina	CR29	17.6					Crinisarina	CRJ29	20	right side
Cleiothyridina	CL30	10.2	Crinisarina	CR30	19.6					Crinisarina	CRJ30	20.7	right side
Cleiothyridina	CL31	11.3	Crinisarina	CR31	20.6					Crinisarina	CRJ31	18.6	left side
Cleiothyridina	CL32	10.8	Crinisarina	CR32	23.2					Crinisarina	CRJ32	12.5	left side
Cleiothyridina	CL33	22.8	Crinisarina	CR33	27					Crinisarina	CRJ33	15.4	right side
Cleiothyridina	CL34	23.5	Crinisarina	CR34	25.4					Crinisarina	CRJ34	18.6	right side
Cleiothyridina	CL35	20.8	Crinisarina	CR35	19.5					Crinisarina	CRJ35	19.9	right side
Cleiothyridina	CL36	19	Crinisarina	CR36	18.1					Crinisarina	CRJ36	19.5	left side
Cleiothyridina	CL37	20	Crinisarina	CR37	23.3					Crinisarina	CRJ37	17.6	right side
Cleiothyridina	CL38	19.1	Crinisarina	CR38	20.6					Crinisarina	CRJ38	17.9	right side
Cleiothyridina	CL39	21.6	Crinisarina	CR39	21					Crinisarina	CRJ39	18	left side
Cleiothyridina	CL40	22.4	Crinisarina	CR40	19.8
Cleiothyridina	CL41	17.6	Crinisarina	CR41	21.7
Cleiothyridina	CL42	19.5	Crinisarina	CR42	26.3
Cleiothyridina	CL43	16.8	Crinisarina	CR43	24.5
Cleiothyridina	CL44	19.3	Crinisarina	CR44	24.5
Cleiothyridina	CL45	18	Crinisarina	CR45	21.2
Cleiothyridina	CL46	18.2	Crinisarina	CR46	24.1
Cleiothyridina	CL47	19.8	Crinisarina	CR47	23
Cleiothyridina	CL48	17.8	Crinisarina	CR48	20.7
Cleiothyridina	CL49	19.4	Crinisarina	CR49	22
Cleiothyridina	CL50	16.5	Crinisarina	CR50	17.2
Cleiothyridina	CL51	13.4	Crinisarina	CR51	19.6
Cleiothyridina	CL52	19.8	Crinisarina	CR52	21.9
Cleiothyridina	CL53	20.2	Crinisarina	CR53	17.9
Cleiothyridina	CL54	16.6	Crinisarina	CR54	21.1
Cleiothyridina	CL55	16.7	Crinisarina	CR55	20.1
Cleiothyridina	CL56	18.8	Crinisarina	CR56	20
Cleiothyridina	CL57	20.8	Crinisarina	CR57	20.6
Cleiothyridina	CL58	20.1	Crinisarina	CR58	18
Cleiothyridina	CL59	18.9	Crinisarina	CR59	13.9
Cleiothyridina	CL60	16.1	Crinisarina	CR60	18.3
Cleiothyridina	CL61	18	Crinisarina	CR61	14.4
Cleiothyridina	CL62	20.6	Crinisarina	CR62	19.7
Cleiothyridina	CL63	16.7	Crinisarina	CR63	15.6
Cleiothyridina	CL64	20.7	Crinisarina	CR64	16.4
Cleiothyridina	CL65	18.7	Crinisarina	CR65	15.8
Cleiothyridina	CL66	16.7	Crinisarina	CR66	17.2
Cleiothyridina	CL67	16.1	Crinisarina	CR67	18.7
Cleiothyridina	CL68	17.1	Crinisarina	CR68	17.7
Cleiothyridina	CL69	20.6	Crinisarina	CR69	18
Cleiothyridina	CL70	18.2	Crinisarina	CR70	19.3
Cleiothyridina	CL71	18.3	Crinisarina	CR71	18
Cleiothyridina	CL72	18	Crinisarina	CR72	17.5
Cleiothyridina	CL73	17.8	Crinisarina	CR73	22.2
Cleiothyridina	CL74	16.7	Crinisarina	CR74	23.8
Cleiothyridina	CL75	21.1	Crinisarina	CR75	18.9
Cleiothyridina	CL76	17.6	Crinisarina	CR76	17.2
Cleiothyridina	CL77	15.7	Crinisarina	CR77	15.1
Cleiothyridina	CL78	21	Crinisarina	CR78	15.2
Cleiothyridina	CL79	17.2	Crinisarina	CR79	16.2
Cleiothyridina	CL80	15.5	Crinisarina	CR80	16.4
Cleiothyridina	CL81	17.7	Crinisarina	CR81	19.5
Cleiothyridina	CL82	15	Crinisarina	CR82	13.2
Cleiothyridina	CL83	14.5	Crinisarina	CR83	19
Cleiothyridina	CL84	16.7	Crinisarina	CR84	19.8
Cleiothyridina	CL85	14.7	Crinisarina	CR85	15.4
Cleiothyridina	CL86	12.8	Crinisarina	CR86	21.8
Cleiothyridina	CL87	12.4	Crinisarina	CR87	22.8
Cleiothyridina	CL88	14.3	Crinisarina	CR88	18.4
Cleiothyridina	CL89	17.9	Crinisarina	CR89	25.9
Cleiothyridina	CL90	14.5	Crinisarina	CR90	25.5
Cleiothyridina	CL91	14.2	Crinisarina	CR91	22.4
Cleiothyridina	CL92	14.6	Crinisarina	CR92	18.8
Cleiothyridina	CL93	15.8	Crinisarina	CR93	20.2
Cleiothyridina	CL94	17.7	Crinisarina	CR94	15.2
Cleiothyridina	CL95	15.4	Crinisarina	CR95	11.6
Cleiothyridina	CL96	16.6	Crinisarina	CR96	16.8
Cleiothyridina	CL97	17.8	Crinisarina	CR97	16.9
Cleiothyridina	CL98	15.4	Crinisarina	CR98	18.3
Cleiothyridina	CL99	18	Crinisarina	CR99	13.8
Cleiothyridina	CL100	14.7	Crinisarina	CR100	14.6
Cleiothyridina	CL101	14.8	Crinisarina	CR101	15.8
Cleiothyridina	CL102	14	Crinisarina	CR102	17.2
Cleiothyridina	CL103	17.2	Crinisarina	CR103	16.7
Cleiothyridina	CL104	14.7	Crinisarina	CR104	17.6
Cleiothyridina	CL105	14	Crinisarina	CR105	18.5
Cleiothyridina	CL106	15.8	Crinisarina	CR106	18.4
Cleiothyridina	CL107	17.1	Crinisarina	CR107	19.3
Cleiothyridina	CL108	14.6	Crinisarina	CR108	15.3
Cleiothyridina	CL109	14.4	Crinisarina	CR109	17.8
Cleiothyridina	CL110	16.1	Crinisarina	CR110	14.6
Cleiothyridina	CL111	14.5	Crinisarina	CR111	15.1
Cleiothyridina	CL112	14	Crinisarina	CR112	15.9
Cleiothyridina	CL113	15.8	Crinisarina	CR113	17.4
Cleiothyridina	CL114	13.7	Crinisarina	CR114	15.6
Cleiothyridina	CL115	12.7	Crinisarina	CR115	16.7
Cleiothyridina	CL116	12.8	Crinisarina	CR116	17.6
Cleiothyridina	CL117	15.5	Crinisarina	CR117	17
Cleiothyridina	CL118	16.5	Crinisarina	CR118	16
Cleiothyridina	CL119	13.6	Crinisarina	CR119	16
Cleiothyridina	CL120	20.3	Crinisarina	CR120	21.9
Cleiothyridina	CL121	13.3	Crinisarina	CR121	14.8
Cleiothyridina	CL122	13.7	Crinisarina	CR122	15.9
Cleiothyridina	CL123	18.4	Crinisarina	CR123	16.4
Cleiothyridina	CL124	14.5	Crinisarina	CR124	15.8
Cleiothyridina	CL125	15.6	Crinisarina	CR125	20.2
Cleiothyridina	CL126	15.9	Crinisarina	CR126	16.6
Cleiothyridina	CL127	15.6	Crinisarina	CR127	15.4
Cleiothyridina	CL128	15.7	Crinisarina	CR128	18.9
Cleiothyridina	CL129	16	Crinisarina	CR129	17.2
Cleiothyridina	CL130	15.8	Crinisarina	CR130	20.2
Cleiothyridina	CL131	12.5	Crinisarina	CR131	18
Cleiothyridina	CL132	14.6	Crinisarina	CR132	19
Cleiothyridina	CL133	14.9	Crinisarina	CR133	18
Cleiothyridina	CL134	19.9	Crinisarina	CR134	15.4
Cleiothyridina	CL135	16	Crinisarina	CR135	18
Cleiothyridina	CL136	14.9	Crinisarina	CR136	19.1
Cleiothyridina	CL137	13	Crinisarina	CR137	21.2
Cleiothyridina	CL138	15	Crinisarina	CR138	17.7
Cleiothyridina	CL139	11.6	Crinisarina	CR139	15.9
Cleiothyridina	CL140	13.8	Crinisarina	CR140	14.7
Cleiothyridina	CL141	15	Crinisarina	CR141	15.8
Cleiothyridina	CL142	11.9	Crinisarina	CR142	19.6
Cleiothyridina	CL143	12.3	Crinisarina	CR143	14.7
Cleiothyridina	CL144	15.9	Crinisarina	CR144	15.5
Cleiothyridina	CL145	13.7	Crinisarina	CR145	19.8
Cleiothyridina	CL146	12.9	Crinisarina	CR146	18.5
Cleiothyridina	CL147	17.3	Crinisarina	CR147	17.3
Cleiothyridina	CL148	15.6	Crinisarina	CR148	17
Cleiothyridina	CL149	15.5	Crinisarina	CR149	19.5
Cleiothyridina	CL150	16.4	Crinisarina	CR150	18.7
Cleiothyridina	CL151	17.5	Crinisarina	CR151	16.8
Cleiothyridina	CL152	12	Crinisarina	CR152	19.5
Cleiothyridina	CL153	12.9	Crinisarina	CR153	20.6
Cleiothyridina	CL154	13.5	Crinisarina	CR154	17.7
Cleiothyridina	CL155	13.8	Crinisarina	CR155	16.2
Cleiothyridina	CL156	14.6	Crinisarina	CR156	16.7
Cleiothyridina	CL157	12.2	Crinisarina	CR157	19.2
Cleiothyridina	CL158	15	Crinisarina	CR158	22.8
Cleiothyridina	CL159	14.1	Crinisarina	CR159	15.9
Cleiothyridina	CL160	12.3	Crinisarina	CR160	15.5
Cleiothyridina	CL161	14.8	Crinisarina	CR161	31.7
Cleiothyridina	CL162	7.7	Crinisarina	CR162	27.1
Cleiothyridina	CL163	12.7	Crinisarina	CR163	22.5
Cleiothyridina	CL164	11.8	Crinisarina	CR164	27.3
Cleiothyridina	CL165	13.6	Crinisarina	CR165	25.7
Cleiothyridina	CL166	16.3	Crinisarina	CR166	16
Cleiothyridina	CL167	18	Crinisarina	CR167	28.7
Cleiothyridina	CL168	17.1	Crinisarina	CR168	26.2
Cleiothyridina	CL169	17.5	Crinisarina	CR169	28
Cleiothyridina	CL170	15.8	Crinisarina	CR170	28.6
Cleiothyridina	CL171	18.3	Crinisarina	CR171	22
Cleiothyridina	CL172	15.5	Crinisarina	CR172	24.9
Cleiothyridina	CL173	15.6	Crinisarina	CR173	24
Cleiothyridina	CL174	17.5	Crinisarina	CR174	23.8
Cleiothyridina	CL175	14.1	Crinisarina	CR175	22
Cleiothyridina	CL176	15.7	Crinisarina	CR176	24.4
Cleiothyridina	CL177	14.6	Crinisarina	CR177	26.8
Cleiothyridina	CL178	15.2	Crinisarina	CR178	26.3
Cleiothyridina	CL179	22.2	Crinisarina	CR179	17.7
Cleiothyridina	CL180	14.6	Crinisarina	CR180	25
			Crinisarina	CR181	29.7
			Crinisarina	CR182	26.3
			Crinisarina	CR183	28.8
			Crinisarina	CR184	21.3
			Crinisarina	CR185	22.1
			Crinisarina	CR186	22.7
			Crinisarina	CR187	23.2
			Crinisarina	CR188	22
			Crinisarina	CR189	20.7
			Crinisarina	CR190	24.5
			Crinisarina	CR191	25.6
			Crinisarina	CR192	23.3
			Crinisarina	CR193	23.8
			Crinisarina	CR194	22.4
			Crinisarina	CR195	24.6
			Crinisarina	CR196	24.9
			Crinisarina	CR197	23.9
			Crinisarina	CR198	22.4
			Crinisarina	CR199	20.9
			Crinisarina	CR200	20.6
			Crinisarina	CR201	23
			Crinisarina	CR202	19.3
			Crinisarina	CR203	20
			Crinisarina	CR204	23.3
			Crinisarina	CR205	22.5
			Crinisarina	CR206	23
			Crinisarina	CR207	21.4
			Crinisarina	CR208	17.4
			Crinisarina	CR209	21.5
			Crinisarina	CR210	22.7
			Crinisarina	CR211	20.5
			Crinisarina	CR212	18.8
			Crinisarina	CR213	25.3
			Crinisarina	CR214	20.5
			Crinisarina	CR215	18.8
			Crinisarina	CR216	19
			Crinisarina	CR217	18.7
			Crinisarina	CR218	18.7
			Crinisarina	CR219	18.9
			Crinisarina	CR220	18
			Crinisarina	CR221	15.6
			Crinisarina	CR222	27.3
			Crinisarina	CR223	24.5
			Crinisarina	CR224	19.6
			Crinisarina	CR225	24.3
			Crinisarina	CR226	22.1
			Crinisarina	CR227	21
			Crinisarina	CR228	20
			Crinisarina	CR229	21.4
			Crinisarina	CR230	21.9
			Crinisarina	CR231	20.7
			Crinisarina	CR232	20.2
			Crinisarina	CR233	18.8
			Crinisarina	CR234	21.2
			Crinisarina	CR235	21.6
			Crinisarina	CR236	18.9
			Crinisarina	CR237	19.5
			Crinisarina	CR238	22.7
			Crinisarina	CR239	23.8
			Crinisarina	CR240	23.6
			Crinisarina	CR241	22.8
			Crinisarina	CR242	17.9
			Crinisarina	CR243	19.9
			Crinisarina	CR244	19.6
			Crinisarina	CR245	28.4
			Crinisarina	CR246	24.9
			Crinisarina	CR247	26.7
			Crinisarina	CR248	18.7
			Crinisarina	CR249	23.7
			Crinisarina	CR250	24.2
			Crinisarina	CR251	24.7
			Crinisarina	CR252	16
			Crinisarina	CR253	18.2
			Crinisarina	CR254	24.2
			Crinisarina	CR255	21.6
			Crinisarina	CR256	27.7
			Crinisarina	CR257	22.9
			Crinisarina	CR258	27.4
			Crinisarina	CR259	24.5
			Crinisarina	CR260	21.9
			Crinisarina	CR261	24.3
			Crinisarina	CR262	22.8
			Crinisarina	CR263	19.3
			Crinisarina	CR264	28.4
			Crinisarina	CR265	24.3
			Crinisarina	CR266	19.5
			Crinisarina	CR267	11.9
			Crinisarina	CR268	20.3
			Crinisarina	CR269	20.7
			Crinisarina	CR270	20.4
			Crinisarina	CR271	18.4
			Crinisarina	CR272	23.2
			Crinisarina	CR273	23.1
			Crinisarina	CR274	18.5
			Crinisarina	CR275	17
			Crinisarina	CR276	23.6
			Crinisarina	CR277	19.4
			Crinisarina	CR278	23.7
			Crinisarina	CR279	26.3
			Crinisarina	CR280	19
			Crinisarina	CR281	24.5
			Crinisarina	CR282	20.4
			Crinisarina	CR283	22.7
			Crinisarina	CR284	20.5
			Crinisarina	CR285	19.5
			Crinisarina	CR286	21
			Crinisarina	CR287	17.4
			Crinisarina	CR288	27
			Crinisarina	CR289	24
			Crinisarina	CR290	25
			Crinisarina	CR291	20
			Crinisarina	CR292	18.9
			Crinisarina	CR293	20.9
			Crinisarina	CR294	25
			Crinisarina	CR295	16.3
			Crinisarina	CR296	13
			Crinisarina	CR297	14.9
			Crinisarina	CR298	17.5
			Crinisarina	CR299	20.3
			Crinisarina	CR300	18.1
			Crinisarina	CR301	23.5
			Crinisarina	CR302	21.2
			Crinisarina	CR303	19
			Crinisarina	CR304	21.7
			Crinisarina	CR305	21.5
			Crinisarina	CR306	24.4
			Crinisarina	CR307	25.7
			Crinisarina	CR308	24.3
			Crinisarina	CR309	22.9
			Crinisarina	CR310	23.3
			Crinisarina	CR311	17.8
			Crinisarina	CR312	13
			Crinisarina	CR313	19.2
			Crinisarina	CR314	17.9
			Crinisarina	CR315	20.5
			Crinisarina	CR316	16.9
			Crinisarina	CR317	22.5
			Crinisarina	CR318	19.4
			Crinisarina	CR319	15
			Crinisarina	CR320	18.8
			Crinisarina	CR321	23.3
			Crinisarina	CR322	22
			Crinisarina	CR323	16.5
			Crinisarina	CR324	20
			Crinisarina	CR325	17.5
			Crinisarina	CR326	20.4
			Crinisarina	CR327	17.4
			Crinisarina	CR328	18.5
			Crinisarina	CR329	19.7
			Crinisarina	CR330	17.9
			Crinisarina	CR331	19.6
			Crinisarina	CR332	23.9
			Crinisarina	CR333	24.1
			Crinisarina	CR334	18.5
			Crinisarina	CR335	19.7
			Crinisarina	CR336	15.8
			Crinisarina	CR337	18.3
			Crinisarina	CR338	23.4
			Crinisarina	CR339	18.2
			Crinisarina	CR340	18.7
			Crinisarina	CR341	19.9
			Crinisarina	CR342	16.3
			Crinisarina	CR343	13.3
			Crinisarina	CR344	19.4
			Crinisarina	CR345	17.2
			Crinisarina	CR346	19.2
			Crinisarina	CR347	18.9
			Crinisarina	CR348	17.5
			Crinisarina	CR349	23.6
			Crinisarina	CR350	15.7
			Crinisarina	CR351	22.3
			Crinisarina	CR352	18.3
			Crinisarina	CR353	14.3
			Crinisarina	CR354	16.5
			Crinisarina	CR355	20.8
			Crinisarina	CR356	21
			Crinisarina	CR357	19.7
			Crinisarina	CR358	17.6
			Crinisarina	CR359	18.3
			Crinisarina	CR360	18.2
			Crinisarina	CR361	22
			Crinisarina	CR362	21.2
			Crinisarina	CR363	21.6
			Crinisarina	CR364	16.8
			Crinisarina	CR365	19.3
			Crinisarina	CR366	19.1
