# Supplementary material for: Malformations in Late Devonian brachiopods from the western Junggar, NW China and their potential causes
Source: PeerJ. 2022 May 16;10:e13447. doi: 10.7717/peerj.13447 (PMC9119298; doi:10.7717/peerj.13447)
Supplement: Supplemental Information 2 [file peerj-10-13447-s002.xlsx]

## Sheet: Sheet1
Supplemental file 2. Concentrations of the trace elements and rare earth elements in the sediments from the Upper Devonian Hongguleleng Formation, western Junggar
	BL-1	BL-2	BL-3	BL-4	BL-5	BL-6	BL-7	B9b-1		BL-1	BL-2	BL-3	BL-4	BL-5	BL-6	BL-7	B9b-1
Ag	0.01	0.1	0.03	0.05	0.02	0.03	0.06	0.01	Nb	0.7	0.5	1	4.6	6.1	2.4	2.5	1.6
Al	0.86	0.45	0.48	1.69	7.66	4.62	4.01	2.07	Nd	8.5	9.3	6.9	10.4	18.5	8.2	8.4	23.3
As	2.3	10	2.5	2.3	3.7	3.5	2.5	1.4	Ni	3.4	4.9	2.9	2.7	15.2	11.3	6.4	5.8
Ba	32.5	18	18.9	75	211	176.5	224	167	P	250	450	290	550	480	180	120	3550
Be	0.13	0.24	0.33	0.18	1.05	0.68	0.55	0.48	Pb	1.3	2.2	5.2	5.1	7.9	9	8.9	3.5
Bi	0.02	0.02	0.03	0.05	0.29	0.09	0.22	0.04	Pr	2.18	2.25	1.71	2.64	4.21	1.79	2.02	5.58
Ca	30.5	32.5	31.9	27.5	1.81	2.59	0.49	24.6	Rb	4.8	3.1	1.6	7.1	18.9	16.9	4.5	10.6
Cd	0.02	0.03	0.03	0.04	0.03	0.07	0.02	0.02	Re	<0.002	<0.002	<0.002	<0.002	<0.002	<0.002	<0.002	0.002
Ce	21.6	20.2	15.2	21.4	32.6	13.8	20.2	41.9	S	0.03	0.75	0.04	0.02	0.01	0.01	0.01	0.02
Co	2.2	2.8	2.4	2.8	9.9	8.2	3.6	2.5	Sb	0.14	0.12	0.06	0.1	1.62	1.42	0.7	0.12
Cr	4	4	6	3	8	9	7	3	Sc	2	1.2	1.5	2.7	16.5	8.7	7.4	4
Cs	0.19	0.13	0.07	0.33	0.79	0.72	3.27	0.26	Se	1	1	1	<1	<1	<1	<1	<1
Cu	3	3	2.3	4.2	66.3	9.4	26.7	2.7	Sm	1.66	1.8	1.43	1.97	4.29	2.07	1.8	4.72
Dy	1.61	1.42	1.66	1.55	4.35	1.74	1.32	3.52	Sn	0.2	<0.2	<0.2	0.3	1.5	0.8	0.6	0.3
Er	1	0.75	1.1	0.88	2.52	0.96	0.82	2.34	Sr	279	303	513	384	590	358	135.5	380
Eu	0.37	0.39	0.36	0.49	1.14	0.52	0.45	1.13	Ta	<0.05	<0.05	0.05	0.25	0.35	0.15	0.16	0.1
Fe	1.35	1.47	1.13	0.91	2.54	2.72	1.59	1.5	Tb	0.25	0.24	0.25	0.26	0.67	0.31	0.24	0.6
Ga	2	1.3	1.3	2.7	12.2	7.7	6.7	4	Te	<0.05	<0.05	<0.05	<0.05	0.3	0.32	0.1	<0.05
Gd	1.61	1.81	1.58	1.77	4.11	1.93	1.52	4.38	Th	0.51	0.38	0.57	0.95	4.33	1.69	2	1.26
Ge	<0.05	<0.05	<0.05	<0.05	0.08	<0.05	<0.05	0.14	Ti	0.025	0.019	0.037	0.071	0.418	0.2	0.177	0.086
Hf	0.3	0.3	0.4	1	4.9	1.8	1.6	0.9	Tl	<0.02	<0.02	<0.02	<0.02	0.02	0.02	<0.02	0.02
Hg	<0.01	<0.01	<0.01	<0.01	<0.01	<0.01	<0.01	<0.01	Tm	0.15	0.11	0.17	0.14	0.38	0.14	0.13	0.38
Ho	0.35	0.28	0.37	0.29	0.89	0.36	0.29	0.81	U	0.69	1.21	0.68	0.65	1.76	0.47	0.5	3.41
In	0.007	0.006	0.006	0.011	0.089	0.048	0.04	0.014	V	8	5	5	10	63	35	24	21
K	0.11	0.06	0.03	0.21	0.63	0.53	0.18	0.31	W	0.1	0.1	0.1	0.2	0.7	0.5	0.5	0.2
La	12.2	10.3	9.5	13.5	11.6	5.8	8.4	24.1	Y	12.1	10.3	13.6	9.8	24.3	9.4	7	27.5
Li	6.8	2.7	3.5	8.4	30.3	20.2	17.5	13.5	Yb	0.98	0.7	1.17	0.88	2.55	0.92	0.88	2.58
Lu	0.16	0.11	0.19	0.13	0.39	0.15	0.14	0.44	Zn	20	15	15	25	84	58	35	16
Mg	0.48	0.32	0.28	0.4	1.07	0.81	0.62	0.42	Zr	11	9	19	38	161	53	53	32
Mn	1690	2270	1450	2980	1190	1150	546	4330	U/Th	1.35	3.18	1.19	0.68	0.41	0.28	0.25	2.71
Mo	0.27	1.29	0.51	0.19	0.46	0.51	0.17	0.26	Ceanom	-0.048	-0.039	-0.098	-0.11	0.015	-0.031	0.035	-0.102
Na	0.08	0.06	0.06	0.67	3.8	2.03	1.74	0.7
Except the concentrations of Al, Ca, Fe, K, Mg, Na, S and Ti are wt %, other elements are ppm.
