# Supplementary material for: Malformations in Late Devonian brachiopods from the western Junggar, NW China and their potential causes
Source: PeerJ. 2022 May 16;10:e13447. doi: 10.7717/peerj.13447 (PMC9119298; doi:10.7717/peerj.13447)
Supplement: Supplemental Information 3 [file peerj-10-13447-s003.xls]

## Sheet: Sheet1
Supplemental file 3. Concentrations of the trace elements and rare earth elements in the athyrid shells from the Hongguleleng Formation, western Junggar
	CL69	CLJ13	CR178	CRJ29		CL69	CLJ13	CR178	CRJ29
Ag	0.01	0.03	<0.01	0.01	Na	0.04	0.05	0.04	0.03
Al	0.46	0.29	0.42	0.44	Nb	0.9	0.5	0.6	0.5
As	2.9	3.6	2.2	2.5	Nd	2.8	3.5	3.6	4.1
Ba	40.6	10.6	28	21.4	Ni	2.6	2.3	2.4	4
Be	0.28	0.21	0.38	0.24	P	100	90	90	90
Bi	0.02	0.01	0.05	0.07	Pb	2.3	2.6	1.9	7.2
Ca	31.9	33.3	32.3	32.7	Pr	0.77	0.97	0.98	1.01
Cd	0.08	<0.02	0.02	0.55	Rb	5.2	2.9	4.3	4.4
Ce	6.3	8.5	8.7	7.9	Re	<0.002	<0.002	<0.002	<0.002
Co	2	2.5	2.6	3.2	S	0.02	0.02	0.04	0.03
Cr	4	3	3	4	Sb	0.06	0.05	0.18	<0.05
Cs	0.25	0.14	0.23	0.29	Sc	1.7	1.5	1.8	3.1
Cu	3.7	2.4	3.6	6.9	Se	<1	<1	<1	<1
Dy	0.56	0.8	0.78	0.88	Sm	0.55	0.77	0.59	0.86
Er	0.39	0.54	0.51	0.54	Sn	0.2	0.2	0.2	0.2
Eu	0.12	0.18	0.17	0.24	Sr	360	440	446	398
Fe	0.64	0.65	0.86	0.55	Ta	<0.05	<0.05	<0.05	<0.05
Ga	2	1	1.1	1.1	Tb	0.09	0.14	0.13	0.15
Gd	0.52	0.8	0.93	0.94	Te	<0.05	<0.05	<0.05	<0.05
Ge	<0.05	<0.05	<0.05	<0.05	Th	0.6	0.41	0.52	0.41
Hf	0.2	0.2	0.2	<0.2	Ti	0.017	0.011	0.017	0.014
Ho	0.13	0.18	0.18	0.19	Tl	0.03	0.02	0.02	0.05
In	<0.005	<0.005	<0.005	<0.005	Tm	0.06	0.08	0.08	0.08
K	0.1	0.06	0.09	0.08	U	0.52	1.62	0.93	0.49
La	4	5	5.6	4.6	V	2	<1	5	4
Li	2.8	2.1	2.6	2.1	W	0.1	0.1	0.1	0.1
Lu	0.07	0.09	0.08	0.08	Y	4.7	6.5	6.6	6.1
Mg	0.32	0.31	0.27	0.27	Yb	0.43	0.56	0.51	0.51
Mn	735	819	912	1280	Zn	13	11	11	12
Mo	0.05	0.26	0.13	0.12	Zr	18	11	10	10
Except the concentrations of Al, Ca, Fe, K, Mg, Na, S and Ti are wt %, other elements are ppm.
